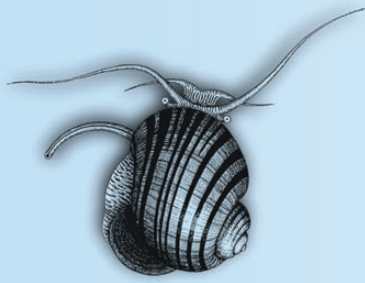

## RESEARCH NOTE

### Supraspecific taxonomy in the Vertiginidae (Gastropoda: Stylommatophora)

Jeffrey C. Nekola<sup>1</sup> and Brian F. Coles<sup>2</sup>

<sup>1</sup>*Department of Biology, University of New Mexico, Albuquerque, NM 87131, USA; and*

<sup>2</sup>*Mollusca Section, Department of Biodiversity, Amgueddfa Cymru - National Museum Wales, Cathays Park, Cardiff CF10 3NP, UK*

*Correspondence: J. C. Nekola; e-mail: jnekola@unm.edu*

The genus *Vertigo* Müller, 1774 consists of *c.* 100 species of terrestrial microsnails *c.* 1.5–3 mm in length with a rounded aperture and 0–6 (sometimes more) apertural lamellae at maturity. As currently defined, the genus is largely Holarctic in distribution with only a few Neotropical species being known (Pilsbry, 1948; Nekola & Rosenberg, 2013).

Consensus does not exist concerning supraspecific taxonomy of the genus. Pilsbry (1919, 1927, 1948) placed *Vertigo*, *Columella* Westerlund, 1878 and *Truncatellina* Lowe, 1852 in the family Pupillidae, subfamily Vertigininae. Based largely on anatomy, he differentiated these from the subfamily Nesopupinae, into which he placed 11 mostly tropical genera: *Bothriopupa* Pilsbry, 1898, *Campolaemus* Pilsbry, 1892, *Costigo* Boettger, 1891, *Cylindrovertilla* Boettger, 1880, *Lypopupa* Pilsbry, 1900, *Nesopupa* Pilsbry, 1900, *Pronesopupa* Iredale, 1913, *Ptychalaea* Boettger, 1889, *Pupisoma* Stoliczka, 1873, *Staurodon* Lowe, 1854 and *Sterkia* Pilsbry, 1898. Bouchet & Rocroi (2005) assigned *Vertigo* to the family Vertiginidae, which in their scheme comprised three subfamilies: Vertigininae, Nesopupinae (both largely as designated by Pilsbry, 1927, but with *Pupisoma* being moved to the Valloniidae) and Gastrocoptinae (including *Gastrocopta* Wollaston, 1878 and 10 related genera). The Gastrocoptinae have subsequently been assigned to the Chondrinidae (Pokryszko *et al.*, 2009).

Pilsbry (1919, 1948) recognized four subgenera within *Vertigo*: *Vertigo* s.s. and the monotypic *Angustula* Sterki, 1888, *Vertilla* Moquin-Tandon, 1855 and *Vertillaria* Pilsbry, 1919. He further divided *Vertigo* s.s. into several informal sections and groups. This treatment was followed until Turgeon *et al.* (1998) and Sysoev & Schileyko (2009), respectively, considered the group *Nearctula* Sterki, 1892 and the subgenus *Vertilla* to be of generic rank. Similar intrageneric division has been prominent within *Nesopupa*; e.g. Gittenberger & van Bruggen (2013) recognized nine genera originally proposed as sections by Pilsbry & Cooke (Pilsbry, 1919): *Afriopupa*, *Cocopupa*, *Helenopupa*, *Indopupa*, *Infranesopupa*, *Insulipupa*, *Nesodagys*, *Nesopupa* and *Nesopupilla*.

To address these issues empirically, we have assembled and phylogenetically analysed DNA sequence data from the nuclear 28S ribosomal RNA (28S) and mitochondrial 16S ribosomal RNA (16S) genes. The species selected for study included the full conchological, biogeographic and ecological range of *Vertigo*, plus representatives of *Columella*, *Gastrocopta*, *Nearctula* and *Truncatellina*, and a variety of putative nesopupillids and other genera within the Pupillidae (*sensu* Pilsbry, 1927). We also included a representative sampling across the infraorder

Orthurethra as designated by Wade, Mordan & Clarke (2001). Among the analysed taxa, the following represent the type species of their respective genera: *Acanthinula aculeata* (Müller, 1774), *Chondrina avenacea* (Bruguière, 1792), *Cochlicopa lubrica* (Müller, 1774), *Columella edentula* (Draparnaud, 1805), *Helix pomatia* Linné, 1758, *Lauria cylindracea* (da Costa, 1778), *Leiostylia anglica* (Wood, 1828), *Nearctula californica* (Rowell, 1862), *Planogyra asteriscus* (Morse, 1857), *Pupilla muscorum* (Linné, 1758) *Pyramidula rupestris* (Draparnaud, 1801), *Solatopupa similis* (Bruguière, 1792), *Sterkia calamitosa* (Pilsbry, 1889), *Strobilops labyrinthica* (Say, 1817), *Vallonia costata* (Müller, 1774), *Vertigo pusilla* (Müller, 1774), *Vertilla angustior* (Jeffreys, 1830) and *Zoogenetes harpa* (Say, 1824). *Carychium tridentatum*, *Helix pomatia* and *Cornu aspersum* were used as comparative outgroups.

Archived GenBank sequences were used for 24 specimens, including data first reported by Armbruster *et al.* (2005) [AY546471], Dinapoli, Zinssmeister & Klusmann-Kolb (2010) [GU331954], Gaitan-Espitia, Nespolo & Opazo (2013) [JQ417194], Ketmaier *et al.* (2010) [[GU046389], Nekola & Rosenberg (2013) [KF214500, KF214496], Nekola *et al.* (2012) [JN941017, JN941032, JN941041, JN941044], Nekola, Coles & Bergthorsson (2009) [GQ921543], Wade, Mordan & Naggs (2006) [AY841284, AY841285, AY841286, AY841333], Wade *et al.* (2001) [AY014019, AY014020, AY014022, AY014023, AY014024, AY014025, AY014027, AY014028, AY014028, AY014030, AY014032, AY014033, AY014040, AY014148] and Weigand *et al.* (2013) [KC206171]. Sequences for the remaining 35 specimens (Table 1) were newly obtained. DNA extraction, purification, PCR amplification and sequencing were performed using previously published methods and primers (see Wade & Mordan, 2000; Nekola & Rosenberg, 2013). The amplified 28S region (Fig. 1) encompasses ITS-2, a region that cannot be aligned because of its intergeneric hypervariability. As a result, all sequence more than 284 bp upstream of the LSU2 primer of Wade & Mordan (2000) was excluded from analysis. The resultant analysed 28S amplicon ranged in length from 809 bp (*Acanthinula aculeata*) to 827 bp (*Columella edentula*). The entire 16S amplicon was used for analysis and ranged in length from 403 bp (*Cornu aspersum*) to 594 bp (*Truncatellina cylindrica*).

Sequences were aligned using ClustalX, with adjustment by eye. Mega v. 5.0 was used to conduct neighbour-joining (NJ), maximum parsimony (MP) and maximum likelihood (ML) analyses separately for the 28S and 16S sequences. NJ analysis was based on maximum composite distance including transitions

**Table 1.** Collection information for specimens analysed in this study.

| Taxon                             | Country     | State or equivalent | County or equivalent | Site                     | Lat./Long.            | Collection/<br>accession no. | 16S GenBank<br>acc. no. | 28S GenBank<br>acc. no. |
|-----------------------------------|-------------|---------------------|----------------------|--------------------------|-----------------------|------------------------------|-------------------------|-------------------------|
| <i>Afripupa bisulcata</i>         | Ghana       |                     |                      | Fetish Grove             | 5.3356 N, 0.0801 W    | deWinter                     | KT008314                | KT008353                |
| <i>Bothriopupa tenuiders</i>      | Costa Rica  | Puntarenas          |                      | Saladera Lodge           | 8.6988 N, 83.3302 W   | Tattersfield                 |                         | KT008355                |
| <i>Columella edentula</i>         | France      | Normandy            | Calvados             | La Vallée des Vaux       | 48.9446 N, 0.4678 W   | BC00001                      | KT008310                | KT008360                |
| <i>Leiostyla anglica</i>          | UK          |                     | Cumbria              | Meathop Cliff Seep       | 54.2066 N, 2.8729 W   | JCN                          | KT008308                | KT008363                |
| <i>Nearctula californica</i>      | USA         | California          | Monterey             | Moss Landing Beach       | 36.8095 N, 121.7880 W | JCN13934                     | KT008315                | KT008349                |
| <i>Nearctula rowelli</i>          | USA         | California          | Placer               | Auburn                   | 38.9072 N, 121.0520 W | JCN17232                     | KT008327                | KT008347                |
| <i>Nesopupa newcombi</i>          | USA         | Hawaii              | Honolulu             | Waianae Forest Reserve   | 21.5009 N, 158.1680 W | UF469195                     | KT008307                | KT008356                |
| <i>Planogyra asteriscus</i>       | USA         | Maine               | Piscataquis          | Atkinson Mills           | 45.1421 N, 69.0312 W  | JCN10494                     | KT008305                | KT008364                |
| <i>Pronesopupa boettgeri</i>      | USA         | Hawaii              | Oahu                 | Kalihi Valley            | 21.3585 N, 157.8580 W | Hayes                        | KT008306                | KT008354                |
| <i>Ptychalaria tamagonori</i>     | Japan       | Tokyo               | Ogasawara            | Chichijima               | 27.0948 N, 142.2166 E | Chiba                        | KT008323                | KT008348                |
| <i>Pupilla muscorum</i>           | Czech Rep.  | Moravia             |                      | Brno                     | 49.2509 N, 16.5738 E  | Horsak                       | KT008313                | KT008361                |
| <i>Pupisoma dioscoricola</i>      | USA         | Florida             | Alachua              | Batram-Carr Woods        | 29.6436 N, 82.3456 W  | Slapcinsky                   | KT008304                | KT008357                |
| <i>Sterkia calamitosa</i>         | USA         | California          | San Diego            | Sumner Canyon            | 32.8734 N, 117.2483 W | JCN18169                     | KT008324                | KT008350                |
| <i>Sterkia clementia</i>          | USA         | California          | San Diego            | San Clemente Island      | 32.9953 N, 118.5516 W | JCN19109                     | KT008325                | KT008351                |
| <i>Sterkia hemphilli</i>          | USA         | California          | San Diego            | Border Fields State Park | 32.5428 N, 117.1061 W | JCN19780                     | KT008331                | KT008352                |
| <i>Strobilops labyrinthica</i>    | USA         | Michigan            | Mackinac             | Brevort Lake             | 45.9829 N, 84.8618 W  | JCN17151                     | KT008309                | KT008362                |
| <i>Truncatellina callicratis</i>  | France      | Normandy            | Calvados             | Pont, N. of Falaise      | 48.9774 N, 0.0902 W   | BC00002                      | KT008302                | KT008358                |
| <i>Truncatellina cylindrica</i>   | Ukraine     | Crimea              |                      | Rozovyi                  | 44.6920 N, 34.3190 E  | Cameron                      | KT008303                | KT008359                |
| <i>Vallonia costata</i>           | USA         | New Mexico          | Bernalillo           | Albuquerque              | 35.0727 N, 106.6160 W | JCN                          | KT008312                |                         |
| <i>Vertigo alabamensis</i>        | USA         | Florida             | Leon                 | Wolf Trap Bay            | 30.3680 N, 84.5700 W  | JCN12323                     | KF214500                | KT008339                |
| <i>Vertigo antivertigo</i>        | UK          | Wales               | Anglesey             | Waun Eraud Fen           | 53.3008 N, 4.2411 W   | JCN                          | KT008316                | KT008338                |
| <i>Vertigo clappi</i>             | USA         | Tennessee           | Carter               | Lynn Mountain            | 36.3545 N, 82.1535 W  | UF299578                     | KT008321                | KT008337                |
| <i>Vertigo cristata</i>           | USA         | Wisconsin           | Oneida               | Sugar Camp Bog           | 45.8499 N, 89.2958 W  | JCN12213                     | GQ921543                | KT008344                |
| <i>Vertigo gouldii</i>            | USA         | West Virginia       | Lincoln              | Big Ugly WMA             | 38.0859 N, 82.0009 W  | Doursen                      | KT008330                | KT008333                |
| <i>Vertigo cf. okinerabuensis</i> | Japan       | Iwate               | Ichinoseki           | Sarusawa                 | 38.9869 N, 141.2550 E | Chiba                        | JN941044                | KT008341                |
| <i>Vertigo malleata</i>           | USA         | North Carolina      | Pender               | Holly Shelter Game Land  | 34.5492 N, 77.7817 W  | UF449308                     | KT008318                | KT008345                |
| <i>Vertigo meramecensis</i>       | USA         | Kentucky            | Bullitt              | Cave Hollow              | 37.9379 N, 85.6334 W  | JCN                          | KT008329                | KT008335                |
| <i>Vertigo milium</i>             | USA         | Iowa                | Buchanan             | Rowley North fen         | 42.3764 N, 91.8507 W  | JCN5747                      | KT008328                | KT008346                |
| <i>Vertigo moulinsiana</i>        | Netherlands | South Holland       | Kaag en Braassem     | Woubrugge, Widje Aa      | 52.1710 N, 4.6119 E   | JCN                          | KT008326                | KT008334                |
| <i>Vertigo pseudosubstriata</i>   | Russia      | Altai Republic      |                      | Seminski Pass S          | 50.9855 N, 85.6817 E  | JCN                          | KT008317                | KT008343                |
| <i>Vertigo pusilla</i>            | Czech Rep.  | Moravia             |                      | Podyji National Park     | 48.8586 N, 15.8960 E  | Horsak                       | KF214496                | KT008342                |
| <i>Vertigo pygmaea</i>            | Czech Rep.  | Moravia             |                      | Kotrlé Fen               | 49.3779 N, 18.0236 E  | JCN                          | KT008322                | KT008340                |
| <i>Vertigo rugosula</i>           | USA         | Arkansas            | Jefferson            | Lock & Dam #5            | 34.4040 N, 92.1020 W  | UF409059                     | KT008319                | KT008332                |
| <i>Vertilla angustior</i>         | Czech Rep.  | Moravia             |                      | Pozdechov Fen            | 49.2339 N, 17.9864 E  | JCN                          | KT008320                | KT008336                |
| <i>Zoogenetes harpa</i>           | Canada      | Quebec              | Manicougan           | Pointe-des-Montes        | 49.3256 N, 67.3700 W  | JCN13609                     | KT008311                |                         |

Abbreviations: BC, Coles collection in National Museum of Wales, of which the accession numbers are to be preceded by 'NMW.Z.2015.009'; JCN, Nekola collection in University of New Mexico; UF, material in Florida Museum of Natural History, Gainesville.

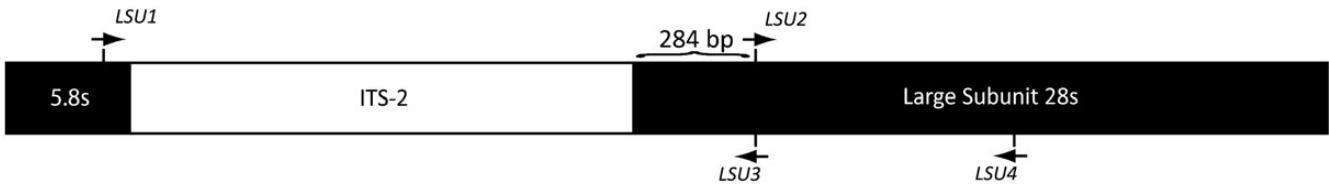

**Figure 1.** Map of the rRNA gene cluster with primer locations for the analysed segment of 28S in relation to the 5.8S and ITS-2 regions.

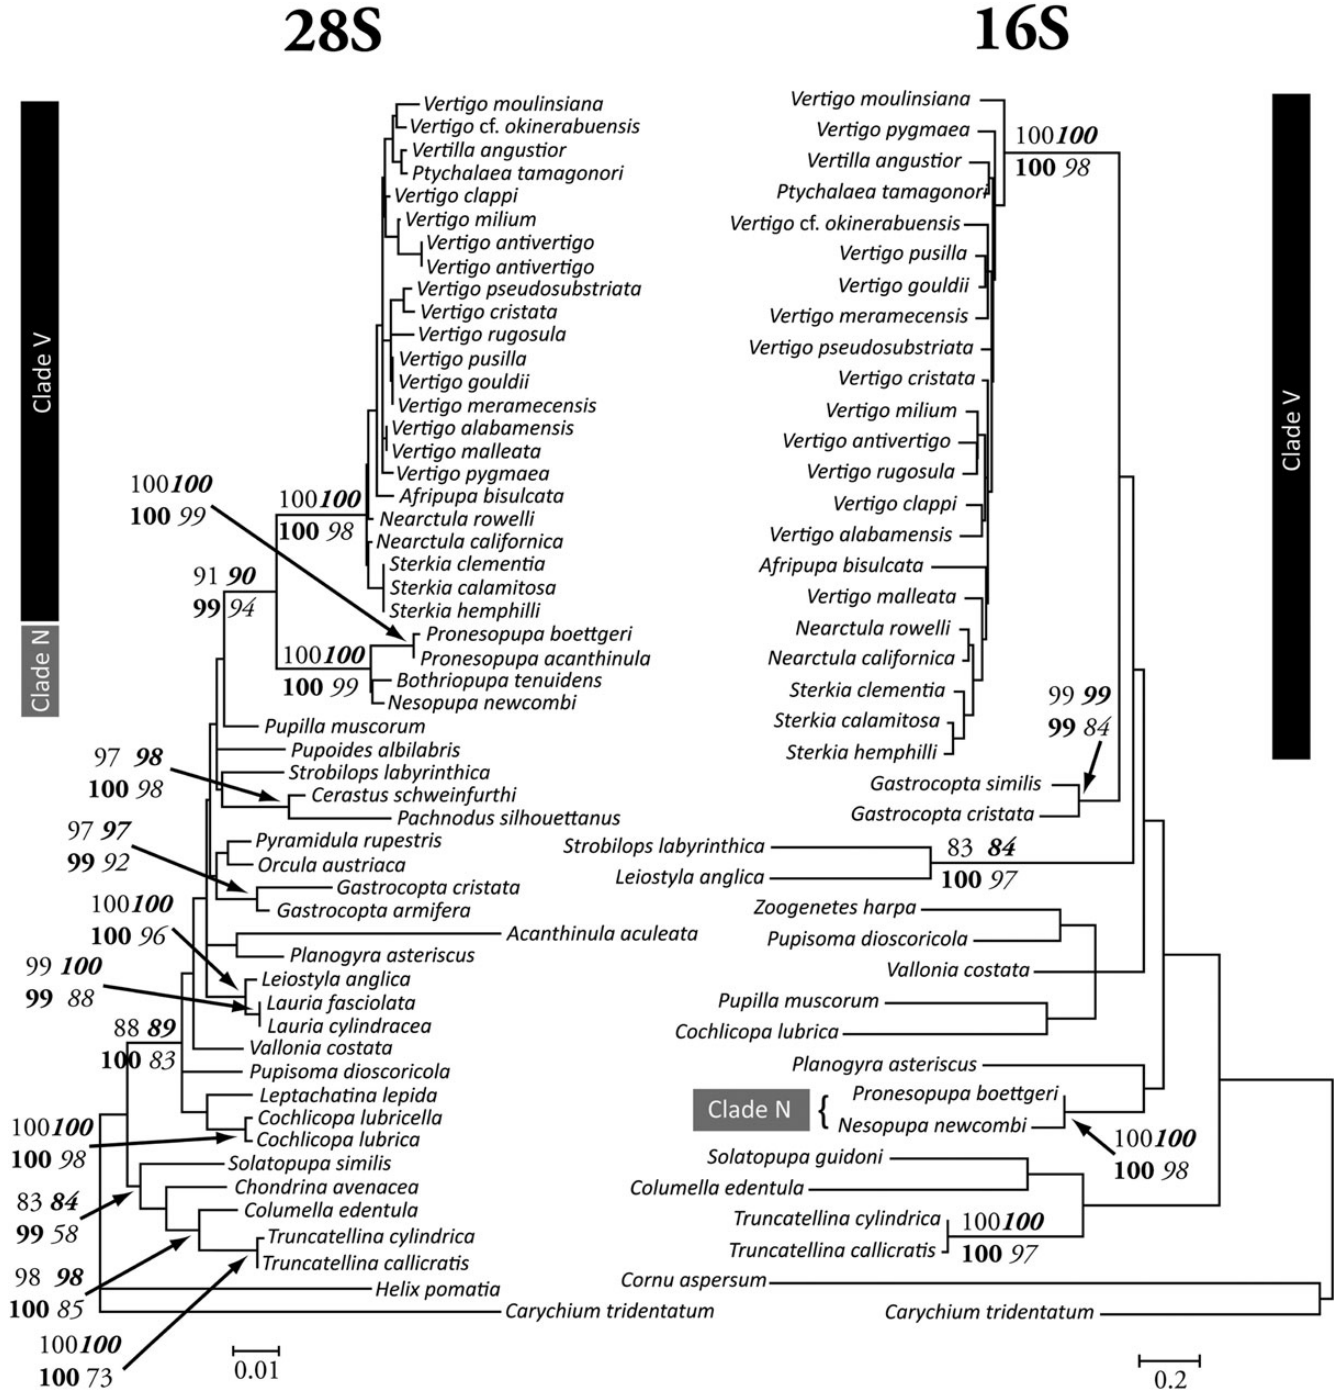

**Figure 2.** Maximum-likelihood phylogenetic tree reconstruction based on nuclear 28S (left) and mitochondrial 16S (right) data. Nodes with strong to moderate support ( $\geq 70$ ) across all four phylogenetic reconstruction methods have been labelled to the left of that node by four support values: upper left (normal font) is for NJ; upper right (**bold italic font**) is for MP; lower left (**bold font**) is for Bayesian; lower right (*italic font*) is for ML.

and transversions with pairwise gap deletion. MP analysis used the close-neighbour interchange search option with the random addition of 10 replicate trees. ML analysis used all sites and was based on the Tamura-Nei substitution model, a five-category gamma distribution for substitution rates and the nearest neighbour interchange ML heuristic method. In all cases support values were estimated from 1,000 bootstrap replicates. Additionally, Bayesian trees were generated using MrBayes v. 3.1 (Huelsenbeck & Ronquist, 2001), with a generalised time reversible substitution model assuming gamma-shaped rate variation over 1,000,000 generations and a sampling frequency of once each 1,000 generations.

Analysis of these data (Fig. 2) demonstrates poorer resolution using the mitochondrial 16S as compared with the nuclear 28S data, presumably due to higher base-pair saturation rates. Therefore, we used the 28S data to deduce phylogenetic relationships and the 16S data for quasi-independent corroboration.

The 28S data show a highly-supported clade composed of two highly-supported sister clades, together including most of the putative Vertigininae (Clade V) and Nesopupinae (Clade N) included in this study. This ‘vertiginid’ clade in general corresponds with the Vertiginidae as outlined by Bouchet & Rocroi (2005) and Pokryszko *et al.* (2009), with the marked exceptions that: (1) *Gastrocopta* is excluded as it is neither closely related to *Vertigo* nor to the chondrinids, but rather represents a distinct branch within the Orthurethra, and (2) both *Columella* and *Truncatellina* are excluded as both are members of a moderately supported clade that includes *Chondrina*. Wade *et al.* (2001, 2006) have shown that the chondrinids are actually sister to the Orthurethra. The analysis of 16S data in general corroborates these findings, albeit without resolving the sister status of clades V and N.

The 28S and 16S trees both demonstrate that Clade N consists only of tropical species historically assigned to the Nesopupinae. These are known to differ anatomically from the Vertigininae by possessing a penial appendix and a forked retractor muscle (Pilsbry, 1919). Clade V includes not only all analysed *Vertigo*, but also the putative genera *Nearctula* and *Vertilla* and members of some genera historically assigned to the Nesopupinae (*Afrispupa*, *Ptychalaia* and *Sterkia*). Pilsbry (1919) lacked anatomical data for any species within these latter three genera and placed them outside of *Vertigo* solely on biogeographical (tropical/subtropical range) and conchological grounds (pustulate shell sculpture, and/or strength and location of angular lamella). Previous analyses have shown that these shell features are not reliable for use in supraspecific taxonomy of pupillids (Coles & Nekola, 2007; Nekola *et al.*, 2009; Nekola, Coles & Horsák, 2015).

It should also be noted that for both the 28S and 16S trees, monophyly of *Vertigo* is only preserved when the taxonomic concept of the genus is expanded to include all members of Clade V. Because support levels for this clade are similar to other apparent genus-level clades (including *Cochlicopa*, *Gastrocopta*, *Lauria* and *Truncatellina*), our data suggest that it would be most parsimonious to assign all species within Clade V to the genus *Vertigo*. Our more limited sampling and representation of type species in the narrowly-constrained Nesopupinae (Clade N) makes it impossible for us to say how many generic-level entities might be supported in that group. However it is interesting to note that the genetic divergence between *Bothriopupa* and *Nesopupa* is well within the range found within *Vertigo*. It thus remains an open question how many genera within the Nesopupinae will ultimately be supported by DNA sequence data.

These data do not support subgeneric classification within *Vertigo*, given that no nodes within Clade V possess support values >70 in either 28S or 16S analyses. However, the weakly supported monophyly of *Nearctula*/*Sterkia* suggests that useful subgeneric groupings may in fact exist. Consideration of these issues must await analysis of other amplicons that are more

rapidly evolving (therefore with more taxonomically useful sites) than 28S, but more slowly evolving (thus with lower base-pair saturation rates) than 16S.

If retained, the family Vertiginidae represents a highly supported clade possessing only two branches: *Vertigo* on one hand and a subset of nesopupids on the other. But how useful is recognition of so small a family? We agree with Puillandre *et al.* (2015) that such decisions are ultimately matters of taxonomic opinion that cannot be subjected to empirical criteria. In this we freely admit to erring on the side of conservatism, as we do not see the utility of erecting a large number of high-level taxonomic groups that constitute only single branches or simple two-branch entities when a more inclusive division containing more taxa is possible by simply stepping back one level in the tree.

Even though outside our primary focus, these analyses also hint that other traditional supraspecific concepts within the Orthurethra may be in need of revision. In particular, the Valloniidae may be polyphyletic with both *Pupisoma* and *Acanthinula*/*Planogyra* each representing their own unique branches within the Orthurethra. The 16S data also suggest that *Zoogoneles* may be more closely related to *Pupisoma*. Pilsbry (1927: vii) appears to have been prescient when he stated “The division of the Orthurethra into families seems to be largely a matter of expediency.” These empirical data validate this statement and strongly suggest that formal reconsideration of supraspecific concepts across the entire infraorder are warranted, based upon DNA sequence data.

## ACKNOWLEDGEMENTS

Specimens used in this analysis were generously provided by Robert Cameron, Satoshi Chiba, Dan Doursen, Ton de Winter, Ken Hayes, Michal Horsák, John Slapcinsky, John Stanisic and Peter Tattersfield. Generous personal donations by Michal Horsák covered laboratory expenses and this work would simply have been impossible without his assistance.

## REFERENCES

- ARMBRUSTER, G.F.J., BOEHME, M., BERNHARD, D. & SCHLEGEL, M. 2005. The H3/H4 histone gene cluster of land snails (Gastropoda: Stylommatophora): TS/TV ratio, GC3 drive and signals in Stylommatophoran phylogeny. *Journal of Molluscan Studies*, **71**: 339–348.
- BOUCHET, P. & ROCROI, J.-P. 2005. Classification and nomenclature of gastropod families. *Malacologia*, **47**: 1–397.
- COLES, B.F. & NEKOLA, J.C. 2007. *Vertigo malleata*, a new extreme calcifuge land snail from the Atlantic and Gulf coastal plains of the U.S.A. (Gastropoda, Vertiginidae). *Nautilus*, **121**: 17–28.
- DINAPOLI, A., ZINSSMEISTER, C. & KLUSMANN-KOLB, A. 2010. New insights into the phylogeny of the Pyramidellidae (Mollusca, Gastropoda). *Journal of Molluscan Studies*, **7**: 1–7.
- GAITAN-ESPITIA, J.D., NESPOLO, R.F. & OPAZO, J.C. 2013. The complete mitochondrial genome of the land snail *Cornu aspersum* (Helicidae: Mollusca): intra-specific divergence of protein-coding genes and phylogenetic considerations within Euthyneura. *PLoS One*, **8**: E67299.
- GITTENBERGER, E. & VAN BRUGGEN, A.C. 2013. Land snails of the islet of Misali, off Pemba Island, Zanzibar, Tanzania. *Zoologische Meddelingen*, **87**: 235–273.
- HUELSENBECK, J.P. & RONQUIST, F. 2001. MRBAYES: Bayesian inference of phylogeny. *Bioinformatics*, **17**: 754–755.
- KETMAIER, V., MANGANELLI, G., TIEDEMANN, R. & GIUSTI, F. 2010. Prei-Tyrrhenian phylogeography in the land snail *Solatopupa guidoni* (Pulmonata). *Malacologia*, **52**: 81–96.
- NEKOLA, J.C., COLES, B.F. & BERGTHORSSON, U. 2009. Evolutionary pattern and process in the *Vertigo gouldii* (Mollusca: Pulmonata, Pupillidae) group of minute North American land snails. *Molecular Phylogenetics and Evolution*, **53**: 1010–1024.

- NEKOLA, J.C., COLES, B.F. & HORSÁK, M. 2015. Species assignment in *Pupilla* (Gastropoda: Pulmonata: Pupillidae): integration of DNA-sequence data and conchology. *Journal of Molluscan Studies*, **81**: 196–216.
- NEKOLA, J.C., JONES, A., MARTINEZ, G., MARTINEZ, S., MONDRAGON, K., LEBECK, T., SLAPCINSKY, J. & CHIBA, S. 2012. *Vertigo shimochii* Kuroda & Amano 1960 synonymized with *Gastrocopta servilis* (Gould, 1843) based on conchological and DNA sequence data. *Zootaxa*, **3161**: 48–52.
- NEKOLA, J.C. & ROSENBERG, G. 2013. *Vertigo marciae* (Gastropoda, Vertiginidae), a new land snail from Jamaica. *Nautilus*, **127**: 107–114.
- PILSBRY, H.A. 1919. *Manual of conchology, second series*. Vol. 25: *Pupillidae* (*Vertigininae, Pupillinae*). Academy of Natural Sciences, Philadelphia.
- PILSBRY, H.A. 1927. *Manual of conchology, second series*. Vol. 28: *Geographic distribution of Pupillidae*. Academy of Natural Sciences, Philadelphia.
- PILSBRY, H.A. 1948. *Land Mollusca of North America (north of Mexico)*. Academy of Natural Sciences of Philadelphia Monograph, 3: vol. 2(2).
- POKRYSZKO, B.M., AUFFENBERG, K., HLAVÁČ, J. & NAGGS, F. 2009. Pupilloidea of Pakistan (Gastropoda: Pulmonata): Truncatellininae, Vertigininae, Gastrocoptinae, Pupillinae (in part). *Annales Zoologici (Warszawa)*, **59**: 423–458.
- PUILLANDRE, N., DUDA, T.F., MEYER, C., OLIVERA, B.M. & BOUCHET, P. 2015. One, four or 100 genera? A new classification of the cone snails. *Journal of Molluscan Studies*, **81**: 1–23.
- SYSOEV, A. & SCHILEYKO, A. 2009. *Land snails and slugs of Russia and adjacent Countries*. Pensoft, Sofia.
- TURGEON, D.D., QUINN, J.F., JR., BOGAN, A.E., COAN, E.V., HOCHBERG, F.G., LYONS, W.G., MIKKELSEN, P., NEVES, R.J., ROPER, C.F.E., ROSENBERG, G., ROTH, B., SCHELTEMA, A., THOMPSON, F.G., VECCHIONE, M. & WILLIAMS, J.D. 1998. *Common and scientific names of aquatic invertebrates from the United States and Canada: mollusks*. Edn 2. American Fisheries Society Special Publication 26, Bethesda, MD.
- WADE, C.M. & MORDAN, P.B. 2000. Evolution within the gastropod molluscs; using the ribosomal RNA gene-clustre as an indicator of phylogenetic relationships. *Journal of Molluscan Studies*, **66**: 565–570.
- WADE, C.M., MORDAN, P.B. & CLARKE, B. 2001. A phylogeny of the land snails (Gastropoda: Pulmonata). *Proceedings of the Royal Society B*, **268**: 413–422.
- WADE, C.M., MORDAN, P.B. & NAGGS, F. 2006. Evolutionary relationships among the Pulmonate land snails and slugs (Pulmonata, Stylommatophora). *Biological Journal of the Linnean Society*, **87**: 593–610.
- WEIGAND, A.M., JOCHUM, A., SLAPNIK, R., SCHNITZLER, J., ZARZA, E. & KLUSSMANN-KOLB, A. 2013. Evolution of microgastropods (Ellobioidea, Carychiidae): integrating taxonomic, phylogenetic and evolutionary hypotheses. *BMC Evolutionary Biology*, **13**: 18.
